1 **Potassium channels contribute to activity-dependent scaling of dendritic inhibition.**

2

3 Jeremy T. Chang and Michael J. Higley

4

5 Department of Neuroscience

6 Program in Cellular Neuroscience, Neurodegeneration and Repair

7 Kavli Institute

8 Yale School of Medicine

9 New Haven, CT 06510

10

11

12

13

14 Correspondence: Michael J. Higley

15 Dept. of Neuroscience, Yale University

16 PO Box 208001

17 New Haven, CT 06520

18 m.higley@yale.edu

19

20

21

22 **Abstract**

23 GABAergic inhibition plays a critical role in the regulation of neuronal activity. In the neocortex,  
24 inhibitory interneurons that target the dendrites of pyramidal cells influence both electrical and  
25 biochemical postsynaptic signaling. Voltage-gated ion channels strongly shape dendritic excitability and  
26 the integration of excitatory inputs, but their contribution to GABAergic signaling is less well understood.  
27 By combining 2-photon calcium imaging and focal GABA uncaging, we show that voltage-gated  
28 potassium channels normally suppress the GABAergic inhibition of calcium signals evoked by back-  
29 propagating action potentials in dendritic spines and shafts of cortical pyramidal neurons. Moreover, the  
30 voltage-dependent inactivation of these channels leads to enhancement of dendritic calcium inhibition  
31 following somatic spiking. Computational modeling reveals that the enhancement of calcium inhibition  
32 involves an increase in action potential depolarization coupled with the nonlinear relationship between  
33 membrane voltage and calcium channel activation. Overall, our findings highlight the interaction between  
34 intrinsic and synaptic properties and reveal a novel mechanism for the activity-dependent scaling of  
35 GABAergic inhibition.

36

37

38

39

40 **Significance Statement**

41 GABAergic inhibition potently regulates neuronal activity in the neocortex. How such inhibition  
42 interacts with the intrinsic electrophysiological properties of single neurons is not well-understood. Here  
43 we investigate the ability of voltage-gated potassium channels to regulate the impact of GABAergic  
44 inhibition in the dendrites of neocortical pyramidal neurons. Our results show that potassium channels  
45 normally reduce inhibition directed towards pyramidal neuron dendrites. However, these channels are  
46 inactivated by strong neuronal activity, leading to an enhancement of GABAergic potency and limiting the  
47 corresponding influx of dendritic calcium. Our findings illustrate a previously unappreciated relationship  
48 between neuronal excitability and GABAergic inhibition.

## 49 **Introduction**

50 Inhibition in the neocortex is primarily mediated by the neurotransmitter gamma-aminobutyric acid  
51 (GABA) through synaptic contacts made by interneurons. These synapses are distributed across the  
52 entire somatodendritic arbor and work to counteract excitatory glutamatergic input. GABAergic synapses  
53 that target the axon initial segment and soma exert a strong influence on somatic voltage, and  
54 consequently play important roles in regulating the generation and timing of action potentials (1-4).  
55 However, the vast majority of inhibitory inputs are formed onto pyramidal cell dendrites (5), and the role of  
56 dendrite-targeting inhibition has been an area of growing interest (6-8).

57 One important function of dendritic inhibition, in addition to action potential regulation, is the  
58 regulation of dendritic calcium signals which are thought to play an instructive role in synaptic plasticity (9-  
59 11). Recent reports in the neocortex and hippocampus have described varying efficacy of dendritic  
60 calcium inhibition, ranging from spatial compartmentalization within individual spines to complete abolition  
61 of actively back-propagating action potentials (bAPs)(10, 12-15). The mechanisms underlying the  
62 heterogeneity of previous findings are unclear, but one contributing factor may be variation in intrinsic  
63 dendritic properties, like voltage-dependent channels, whose impact on GABAergic inhibition of bAPs is  
64 not well understood. Indeed, earlier work in hippocampal neurons suggested that the inhibition of bAP-  
65 evoked dendritic calcium signaling may be inversely correlated with the magnitude of the calcium  
66 transient (14), consistent with an interaction between GABAergic potency and dendritic excitability.

67 The expression of voltage-gated ion channels within neuronal dendrites regulates cellular  
68 excitability and strongly influences synaptic integration (16-20). Potassium channels, including those  
69 sensitive to the blocker 4-aminopyridine (4-AP), are expressed throughout the dendritic arbors of cortical  
70 and hippocampal pyramidal neurons and have been implicated in the regulation of back-propagating  
71 action potentials (bAPs) and excitatory synaptic integration (21-26). Interestingly, A-type Kv4.2 channels  
72 have been shown to preferentially co-localize with GABAergic synapses, suggesting they may also play a  
73 role in the control of inhibition (27, 28).

74 Here, we examine how voltage-gated potassium channels alter GABAergic inhibition of bAP-  
75 evoked Ca<sup>2+</sup> signals ( $\Delta$ Ca<sup>2+</sup>) in dendrites of L5 pyramidal neurons in mouse visual cortex. We show that  
76 the blockade of these channels enhances both the amplitude of bAP-evoked  $\Delta$ Ca<sup>2+</sup> and unexpectedly  
77 also the inhibition of bAP-evoked  $\Delta$ Ca<sup>2+</sup>. We also show that the voltage-dependent inactivation of these  
78 channels gives rise to a scaling of dendritic GABAergic inhibition, such that inhibitory efficacy is enhanced  
79 following strong somatic activity. Thus, our findings demonstrate that intrinsic excitability interacts with  
80 GABAergic synaptic input to dynamically regulate dendritic Ca<sup>2+</sup> signaling.

81

## 82 **Results**

83 In order to investigate the impact of potassium channels on dendritic inhibition, we performed  
84 two-photon calcium imaging of bAP-evoked dendritic Ca<sup>2+</sup> transients in layer 5 pyramidal neurons  
85 (L5PNs) of mouse visual cortex (Figure 1A). Ca<sup>2+</sup> signals were measured in dendritic spines and

86 neighboring shafts along the primary apical dendrite, 100-150  $\mu\text{m}$  from the soma (Figure 1B). To probe  
87 the effects of GABAergic inhibition on  $\Delta\text{Ca}^{2+}$ , we compared uninhibited  $\Delta\text{Ca}^{2+}$  from bAPs induced by  
88 somatic current injection with  $\Delta\text{Ca}^{2+}$  from bAPs preceded (15 ms) by local (at the imaging site) uncaging  
89 of RuBi-GABA (29). To compare observations across different recordings, GABAergic inhibition of  $\Delta\text{Ca}^{2+}$   
90 was quantified as in previous studies as  $(\Delta\text{Ca}^{2+}_{\text{Ctl}} - \Delta\text{Ca}^{2+}_{\text{Inh}}) / \Delta\text{Ca}^{2+}_{\text{Ctl}}$  (10). The magnitude of this  $\text{Ca}^{2+}$   
91 inhibition was measured before and after bath-application of the potassium channel blocker 4-  
92 aminopyridine (4-AP)(Figure 1A). Treatment with 4-AP broadened the somatic action potential  
93 ( $p=0.0020$ )(Figure 1C) and increased the average peak  $\Delta\text{Ca}^{2+}$  evoked by a single bAP for both spines  
94 ( $p=0.0059$ ) and neighboring shafts ( $p=0.0137$ ) (Figure 1D-G). Moreover, 4-AP significantly increased the  
95 amplitude of the uncaging-evoked inhibitory postsynaptic potential (IPSP, Fig. 1C,  $p=0.0391$ ) and  
96 enhanced the average GABAergic inhibition of  $\Delta\text{Ca}^{2+}$  for both spines ( $p=0.0195$ ) and neighboring shafts  
97 ( $p=0.0098$ ) (Figure 1D-G). This result was not observed when slices were pre-treated with the GABA<sub>A</sub>R  
98 antagonist picrotoxin (data not shown).

99 Next, we investigated whether the actions of 4-AP on dendritic  $\text{Ca}^{2+}$  inhibition required block of  
100 potassium channels near the site of GABAergic input. We used a puffer pipette to locally apply 4-AP at  
101 different locations along the somatodendritic axis. When applied to the proximal apical dendrite (at the  
102 site of GABA uncaging), 4-AP replicated the effects of bath-application on the magnitude of bAP-evoked  
103  $\Delta\text{Ca}^{2+}$  and its inhibition by GABA. Specifically, 4-AP increased  $\Delta\text{Ca}^{2+}$  in spines ( $p=0.0156$ ) and  
104 neighboring shafts ( $p=0.0313$ ) (Figure 2A-D). GABAergic inhibition of  $\Delta\text{Ca}^{2+}$  was also enhanced in  
105 spines ( $p=0.0469$ ) and neighboring shafts ( $p=0.0313$ ) (Figure 2A-D). In contrast, application of 4-AP to  
106 the cell body had no impact on peak  $\Delta\text{Ca}^{2+}$  or its inhibition by GABA within the proximal apical dendrite  
107 (Supplemental Fig. 1). Thus, our data suggest that the impact of 4-AP on GABAergic inhibition of  $\text{Ca}^{2+}$  is  
108 mediated by a distinct pool of dendritic potassium channels.

109 One feature of many potassium channels is their voltage-dependent inactivation, which limits their  
110 conductance during periods of high neuronal activity (30, 31). We therefore asked whether this property  
111 might enable dendritic GABAergic inhibition to dynamically scale with somatic firing. To test this  
112 hypothesis, we compared GABAergic inhibition of  $\Delta\text{Ca}^{2+}$  evoked by a bAP alone or preceded 20 ms by a  
113 train of 5 bAPs at 100 Hz (Figure 3A). Similar to 4-AP, the preceding train significantly enhanced the peak  
114  $\Delta\text{Ca}^{2+}$  for both spines ( $p=0.002$ ) and neighboring shafts ( $p=0.002$ ) and also enhanced GABAergic  
115 inhibition of  $\Delta\text{Ca}^{2+}$  for spines ( $p=0.0059$ ) and neighboring shafts ( $p=0.002$ )(Figure 3B-D). Importantly, the  
116 ability of the 100 Hz train to enhance dendritic inhibition was occluded by prior bath application of 4-AP  
117 (Supplemental Fig. 2), suggesting that both manipulations target a similar population of dendritic  
118 potassium channels.

119 We next asked whether activity-dependent scaling of inhibition could be seen with synaptic GABA  
120 release. To test this, we expressed channelrhodopsin-2 (ChR2) in a subset of dendrite-targeting cortical  
121 interneurons expressing somatostatin (SOM-INs)(Figure 4A). Brief pulses of blue light were used to  
122 activate SOM-INs and produce postsynaptic IPSPs. We repeated experiments comparing the GABAergic

123 inhibition of  $\Delta\text{Ca}^{2+}$  evoked by a bAP alone or preceded by a 100 Hz train. As with GABA uncaging, trains  
124 of somatic action potentials significantly enhanced the magnitude of  $\Delta\text{Ca}^{2+}$  in spines ( $p=0.0098$ ) and  
125 neighboring shafts ( $p=0.0059$ ) and led to stronger GABAergic inhibition of  $\Delta\text{Ca}^{2+}$  for both spines  
126 ( $p=0.0273$ ) and neighboring shafts ( $p=0.0273$ ) (Figure 4B-D). Taken together, these results demonstrate  
127 that voltage-dependent potassium channels in the apical dendrite play a key role in shaping the impact of  
128 synaptic GABAergic inhibition on bAP-evoked  $\Delta\text{Ca}^{2+}$ .

129 Finally, to examine the biophysical mechanisms underlying the interaction of dendritic potassium  
130 channels with GABAergic signaling, we simulated an active dendritic compartment (see Methods) and  
131 tested the impact of varying an A-type potassium conductance ( $g_{K_A}$ ) on the magnitude of  $\text{Ca}^{2+}$  inhibition  
132 (Figure 5). We found that varying the maximal dendritic  $g_{K_A}$  between control (70 mS/cm<sup>2</sup> in the distal  
133 compartment, 17.0 mS/cm<sup>2</sup> at the synapse) and low (10 mS/cm<sup>2</sup> in the distal compartment, 2.4 mS/cm<sup>2</sup>  
134 at the synapse) conditions, thus simulating application of 4-AP, recapitulated our experimental data,  
135 increasing the peak AP amplitude and enhancing  $\text{Ca}^{2+}$  inhibition. (Fig. 5A). Interestingly, the reduction in  
136 peak AP amplitude caused by GABAergic inhibition was not strongly affected by reducing  $g_{K_A}$  (Fig. 5B).  
137 However, we found that the relationship between peak AP amplitude and peak  $\text{Ca}^{2+}$  current was highly  
138 supralinear (Fig. 5C). Thus, a similar amount of GABAergic shift in the peak membrane potential  
139 produced a substantially larger inhibition of  $\text{Ca}^{2+}$  influx when  $g_{K_A}$  was reduced (Fig. 5C). Our model  
140 therefore demonstrates a straightforward biophysical mechanism linking potassium conductance,  
141 GABAergic signaling, and  $\text{Ca}^{2+}$  inhibition in PN dendrites.

142

## 143 Discussion

144 Voltage-gated potassium channels are widely recognized as key modulators of neuronal  
145 excitability as well as synaptic integration and plasticity (22, 24, 26, 32-34). In the present work, we have  
146 described a role for these channels in the regulation of GABAergic control over dendritic  $\text{Ca}^{2+}$  signaling.  
147 Using a combination of electrophysiology, 2-photon  $\text{Ca}^{2+}$  imaging, and focal GABA uncaging, we show  
148 that blocking potassium channels either pharmacologically or via activity-dependent inactivation  
149 enhances both bAP-evoked  $\text{Ca}^{2+}$  influx and GABAergic inhibition of these transients in the apical  
150 dendrites of L5PNs. Our results demonstrate that dendritic inhibition is highly regulated by the expression  
151 of voltage-dependent channels near the site of synaptic input.

152 Dendritic potassium channels comprise a diverse molecular group, including both Kv1-, Kv3, and  
153 Kv4-type channels (26, 35). The observation that brief trains of APs appear to rapidly inactivate the  
154 channels regulating dendritic inhibition suggests a contribution from A-type conductances, known to be  
155 highly sensitive to both membrane depolarization and 4-AP (30, 36-38). Several previous studies have  
156 implicated A-type channels in the regulation of both dendritic excitability and glutamatergic synaptic  
157 integration. In both CA1 and cortical pyramidal neurons, the presence of A-type channels limits the  
158 spread of voltage between distinct compartments, such as the distal and proximal apical dendrite,  
159 regulating both the back propagation of action potentials and the spread of synaptically evoked dendritic

160 spikes (23, 24, 31, 34, 39, 40). Our study suggests that these channels similarly restrict the efficacy of  
161 GABAergic inhibition, enabling A-type channels to serve as dendritic “shock absorbers”, limiting the  
162 impact of synaptic inputs from all sources (41). An intriguing possibility is that voltage-gated potassium  
163 channels asymmetrically regulate excitation and inhibition, potentially leading to moment-to-moment  
164 alterations of the balance between these opposing drives, a hypothesis whose examination will require  
165 additional studies.

166 In addition to regulating dendritic excitability, voltage-dependent potassium channels have been  
167 implicated in shaping long-term plasticity of glutamatergic synapses. In particular, studies have focused  
168 on spike-timing dependent plasticity (STDP), where bAPs can potentiate or depress synaptic inputs  
169 depending on their relative timing to synaptic activity (42, 43). For example, EPSPs in CA1 pyramidal  
170 neuron dendrites can inactivate A-type channels, enhancing the dendritic invasion of somatic action  
171 potentials and subsequent plasticity (22). Recent experimental and computational studies have also  
172 suggested a key role for GABAergic inhibition in spike-timing dependent plasticity (44-47). For example,  
173 focal activation of GABAergic synapses in CA1 dendrites was shown to convert long-term potentiation to  
174 depression due to negative regulation of dendritic Ca<sup>2+</sup> influx (44). Together, these various findings  
175 suggest that the interaction of NMDARs, A-type channels, and GABAergic inhibition may strongly  
176 contribute to the development and maintenance of cortical circuits.

177 It is intriguing to speculate that expression patterns of potassium channels may also explain some  
178 of the recent diversity in studies examining GABAergic control of dendritic  $\Delta$ Ca<sup>2+</sup>. Previous work from our  
179 lab showed that inhibition could be highly compartmentalized in layer 2/3 pyramidal neurons, with  
180 neighboring spines exhibiting markedly different amounts of inhibition (10). In contrast, work from other  
181 groups has shown that more broad dendritic inhibition can occur in L5PNs and hippocampal CA1  
182 pyramidal neurons (13-15). Differential expression and recruitment of voltage-gated conductances, such  
183 as KA channels, would be expected to contribute to the heterogeneity of inhibitory function across cell  
184 types.

185 Our computational modeling provides additional insight into the biophysical mechanism  
186 underlying the interaction of potassium channels and GABAergic inhibition of Ca<sup>2+</sup> influx. We found that  
187 decreasing gK<sub>A</sub> increased the peak depolarization of the AP, producing a supralinear increase in Ca<sup>2+</sup>  
188 current and a subsequent enhancement of Ca<sup>2+</sup> inhibition. The relationship between action potential  
189 waveform and calcium influx has been demonstrated previously in presynaptic terminals (48, 49). Our  
190 results highlight a similar phenomenon in dendrites and indicate that a major contributor to the potency of  
191 GABAergic influence over dendritic Ca<sup>2+</sup> signaling is the relationship between bAP waveform and Ca<sup>2+</sup>  
192 channel activation. Our results differ from previously published work in hippocampal PNs that found  
193 increased Ca<sup>2+</sup> inhibition for smaller Ca<sup>2+</sup> transients (14). In contrast, we find that in both experimental  
194 and simulation data, GABAergic inhibition is more potent when the Ca<sup>2+</sup> transient is larger following  
195 reduction of potassium channel conductance. The disparate findings likely reflect a complicated

196 relationship between total membrane conductance, depolarization, and Ca<sup>2+</sup> channel activation that may  
197 vary between cell types and experimental conditions.

198 Finally, we found that the voltage-dependent inactivation of potassium channels allows for the  
199 enhancement of GABAergic inhibition in the presence of high frequency somatic spike generation. This  
200 suggests that dendritic inhibition may exert greater control over Ca<sup>2+</sup> signaling during periods of high  
201 network activity or somatic depolarization, essentially acting as a source of homeostatic control. These  
202 findings are consistent with previous experimental and computational studies demonstrating the activity-  
203 dependent amplification of trains of bAPs in L5PN apical dendrites (31, 50, 51). Our results suggest that  
204 the dynamic properties of active dendritic conductances enable the alteration of GABAergic inhibition over  
205 short millisecond time frames, providing the basis for a context-dependent, flexible role of GABAergic  
206 signaling in shaping biochemical signaling in dendrites.

207

## 208 **Materials and Methods**

### 209 **Slice Preparation**

210 All animal handling was performed in accordance with guidelines approved by the Yale  
211 Institutional Animal Care and Use Committee and federal guidelines. For GABA uncaging experiments,  
212 subjects were male wild-type C57-BL6 mice, ages P30-40 (Harlan). For optogenetic experiments,  
213 subjects were male and female SOM-Cre mice, ages P30-40 (IMSR Cat# JAX:013044,  
214 RRID:IMSR\_JAX:013044). Under isoflurane anesthesia, mice were decapitated and coronal slices (300  
215  $\mu\text{m}$  thick) containing primary visual cortex were cut in ice cold external solution containing (in mM): 110  
216 choline, 25 NaHCO<sub>3</sub>, 1.25 NaH<sub>2</sub>PO<sub>4</sub>, 2.5 KCl, 7 MgCl<sub>2</sub>, 0.5 CaCl<sub>2</sub>, 20 glucose, 11.6 sodium ascorbate,  
217 and 3.1 sodium pyruvate, bubbled with 95% O<sub>2</sub> and 5% CO<sub>2</sub>. After an incubation period of 20 minutes at  
218 34°C, slices were transferred to artificial cerebrospinal fluid (ACSF) containing in (mM): 127 NaCl, 25  
219 NaHCO<sub>3</sub>, 1.25 NaH<sub>2</sub>PO<sub>4</sub>, 2.5 KCl, 1 MgCl<sub>2</sub>, 2 CaCl<sub>2</sub>, and 20 glucose bubbled with 95% O<sub>2</sub> and 5%  
220 CO<sub>2</sub> and maintained at room temperature (20-22°C) for at least 20 min until use.

221

### 222 **Electrophysiology and imaging**

223 Experiments were conducted at room temperature in a submersion type recording chamber.  
224 Whole-cell patch clamp recordings were obtained from layer 5 pyramidal neurons (500  $\mu\text{m}$  to 600  $\mu\text{m}$   
225 from the pial surface) identified with video infrared-differential interference contrast. For current-clamp  
226 recordings, glass electrodes (2-4 M $\Omega$  tip resistance) were filled with internal solution containing (in mM):  
227 135 KMeSO<sub>3</sub>, 10 HEPES, 4 MgCl<sub>2</sub>, 4 Na<sub>2</sub>ATP, 0.5 NaGTP, and 10 sodium creatine phosphate,  
228 adjusted to pH 7.3 with KOH. For Ca<sup>2+</sup> imaging experiments, red fluorescent Alexa Fluor-568 (40  $\mu\text{M}$ )  
229 and green fluorescent Ca<sup>2+</sup>-sensitive Fluo-5F (300  $\mu\text{M}$ ) were included in the pipette solution to visualize  
230 cell morphology and changes of intracellular Ca<sup>2+</sup> concentration, respectively. Electrophysiological  
231 recordings were made using a Multiclamp 700B amplifier (Molecular Devices), filtered at 4 kHz, and



232 digitized at 10 kHz. For all recordings, membrane potential was adjusted to -64 mV using current injection  
233 through the pipette.

234 Two-photon imaging was performed with a custom-modified Olympus BX51-WI microscope,  
235 including components manufactured by Mike's Machine Company. Fluorophores were excited using 840  
236 nm light from a pulsed titanium-sapphire laser. Emissions were separated using appropriate optical filters  
237 (Chroma, Semrock) and collected by photomultiplier tubes (Hamamatsu). A mechanical shutter was  
238 placed in front of the collectors to prevent damage during blue light stimulation. For Ca<sup>2+</sup> imaging, signals  
239 were collected during a 500 Hz line scan across a spine and neighboring dendritic shaft on the main  
240 apical trunk 100 μm to 150 μm from the cell body. Back-propagating action potentials (bAPs) were  
241 evoked using a brief depolarizing current pulse (0.5 ms, 1.5-2.5 nA) through the recording pipette. Trials  
242 including bAP alone, IPSP-bAP, and IPSP alone were interleaved with a 45 second inter-trial interval. In a  
243 subset of experiments, trains of action potentials at 50 Hz and 100 Hz were elicited by current pulse  
244 injections through the recording pipette, ending 20 ms prior to a single current pulse. In this case, trials  
245 including single bAP alone, train-bAP alone, IPSP-bAP, train-IPSP-bAP, IPSP alone, train-IPSP, and train  
246 alone were interleaved with a 45 ms inter-trial interval. Fluorescent traces were computed for individual  
247 cells as the average of 10 trials.

248 Reference frame scans were taken between each acquisition to correct for small spatial drift over  
249 time. Ca<sup>2+</sup> signals were first quantified as changes in green fluorescence from baseline normalized to the  
250 average red fluorescence ( $\Delta G/R$ ). To permit comparison of the imaging data across various microscope  
251 configurations, we expressed fluorescence changes as the fraction of the G/R ratio measured in  
252 saturating Ca<sup>2+</sup> ( $\Delta G/G_{sat}$ ).

253

## 254 **Data acquisition and analysis**

255 Imaging and physiology data were acquired using custom software written in MATLAB. Off-line  
256 analysis was performed using custom routines written in MATLAB (MATLAB, RRID:SCR\_001622) and  
257 IgorPro (Wavemetrics Software, RRID:SCR\_000325). Ca<sup>2+</sup> responses were calculated as the integral of  
258 the fluorescence transient over the first 100 ms after bAP initiation. In order to enable comparisons across  
259 cells, Ca<sup>2+</sup> inhibition was expressed as in previous studies (10) as  $(\Delta Ca_{2+_{Ctl}} - \Delta Ca_{2+_{Inh}}) / \Delta Ca_{2+_{Ctl}}$ . All  
260 statistical comparisons were made using the non-parametric Wilcoxon matched pairs signed rank test in  
261 GraphPad Prism version 7.01 (GraphPad Prism, RRID:SCR\_002798) unless otherwise noted.

262

## 263 **Pharmacology**

264 For all GABA uncaging experiments, ACSF included 3 μM CGP-55845 hydrochloride (Tocris Cat.  
265 No. 1248) to block GABA<sub>B</sub> receptors, 10 μM (R)-CPP (Tocris Cat. No. 0247) to block NMDA receptors,  
266 and 10 μM NBQX disodium salt (Tocris Cat. No. 1044) to block AMPA receptors. For a subset of  
267 experiments, the ACSF included 5 mM 4-aminopyridine (Tocris Cat. No. 0940) or 100 μM picrotoxin  
268 (Tocris Cat. No 1128). Local application of 25 mM 4-AP was achieved using a glass puffer pipette (< 2 μm



269 tip) coupled to a Picospritzer. Drugs were ejected continuously with 10-17 psi, and pipettes were position  
270 30-70  $\mu\text{m}$  from the targeted structure at the surface of the slice. In experiments where one-photon  
271 uncaging was performed with local drug application, 10.8  $\mu\text{M}$  RuBi-GABA was included in the puffer  
272 pipette. In a subset of cells, somatic current injections elicited bursts of action potentials in the presence  
273 of 4-AP and were excluded from subsequent analysis.

274 Visible light-evoked GABA uncaging was accomplished using RuBi-GABA (10.8  $\mu\text{M}$ ) bath-  
275 applied in the ACSF (29). We overfilled the back aperture of the microscope objective (60x, 1.0 NA) with  
276 collimated blue light from a fiber-coupled 473 nm laser. Spherical aberrations due to fiber-coupling  
277 resulted in a 15-20  $\mu\text{m}$  diameter disc of light at the focal plane centered on the field of view. A brief (0.5  
278 ms) pulse of light (1-2 mW at the sample) reliably evoked uncaging-evoked IPSPs. For  $\text{Ca}^{2+}$  imaging  
279 experiments, a blue light photo-artifact was corrected by subtracting fluorescence traces on uncaging-  
280 alone trials from those with  $\text{Ca}^{2+}$  imaging. For all experiments, GABA uncaging occurred 15 ms prior to  
281 bAP initiation.

282

### 283 **ChR2 Expression and Activation**

284 To stimulate SOM-INs, SOM-Cre mice were injected 13-23 days prior to slice preparation into the  
285 primary visual cortex with recombinant adeno-associated virus (AAV) driving conditional expression of a  
286 ChR2-eYFP fusion protein under the Ef1a-promoter (AAV-DIO-Ef1a-ChR2-EYFP)(UNC Vector Core).  
287 Optogenetic stimulation was accomplished using the same light source and path as one-photon GABA  
288 uncaging (see above). Brief (2-3 mW, 0.5 ms) pulses were used to stimulate SOM-INs 15 ms prior to bAP  
289 initiation.

290

### 291 **NEURON Modeling**

292 Multi-compartment time-dependent simulations were run using NEURON v7.4 (NEURON,  
293 RRID:SCR\_005393, available free at <http://neuron.med.yale.edu>) and analyzed using custom scripts  
294 written in Jupyter Notebooks 4.1.0 using Python 3.5.2. We modified a previously published ball and stick  
295 model adding two apical dendrites and dividing the main apical dendrite into 100 segments (length 5  $\mu\text{m}$   
296 each) (10). Sodium channels (4  $\text{mS}/\text{cm}^2$ ) and Hodgkin-Huxley style potassium channels (0.1  $\text{mS}/\text{cm}^2$ )  
297 were constant throughout the dendrite. A single dendritic spine (1  $\mu\text{m}$  diameter) was attached to the  
298 apical dendrite 122.5  $\mu\text{m}$  from the cell body by a neck (1  $\mu\text{m}$  length, 0.07  $\mu\text{m}$  diameter). A GABAergic  
299 synapse (utilizing GABAA receptors) was modeled as an exponential synapse with the NEURON  
300 Exp2Syn mechanism ( $G_{\text{max}}=2$  nS,  $\tau_1=5$  ms,  $\tau_2=74$  ms), contacting the dendritic shaft located 122.5  $\mu\text{m}$   
301 from the cell body. Chloride reversal potential was set to -70 mV. We modeled an A-type potassium  
302 conductance using a previously published channel definition that fits observed currents in distal dendrites  
303 (52, 53). The A-type channel densities were set at 0 at the soma and proximal dendritic segment and  
304 increased linearly with distance. Maximum conductance in the distal segment of the dendrite was varied  
305 from 10  $\text{mS}/\text{cm}^2$  to 70  $\text{mS}/\text{cm}^2$ . A previously published medium voltage-gated calcium channel was

306 inserted into the dendritic spine and neighboring dendrite ( $1e-7$  mS/cm<sup>2</sup>) such that currents through these  
307 channels would minimally impact membrane potential (54). In order to reproduce our experimental  
308 conditions, an iterative search was conducted to find a somatic current injection that maintained the  
309 somatic resting potential at 64.00 +/- 0.001 mV at the cell body for each condition tested. Back-  
310 propagating action potentials were generated by current injection to the somatic compartment, and  
311 inhibitory conductance preceded action potentials by 15 ms. Similar to our experiments, we quantified  
312 calcium flux over a 100 ms window in order to calculate percent calcium change due to inhibition. Data  
313 were generated for fixed time steps (implicit Euler, dt= 0.005 ms). To speed up simulation time,  
314 simulations were run in parallel using the built-in message passing interface of NEURON.

315

316

### 317 **Acknowledgements**

318 The authors thank Drs. Jess Cardin, Susumu Tomita, and Michael Crair as well as members of the Higley  
319 lab for constructive comments during the preparation of this manuscript. Experiments were supported by  
320 funding from the March of Dimes (Basil O'Connor Award) and the NIH (R01 MH099045, T32 EY22312).

321

322

323 **References**

324

- 325 1. Zhu Y, Stornetta RL, & Zhu JJ (2004) Chandelier cells control excessive cortical excitation:  
326 characteristics of whisker-evoked synaptic responses of layer 2/3 nonpyramidal and pyramidal  
327 neurons. *The Journal of neuroscience : the official journal of the Society for Neuroscience*  
328 24(22):5101-5108.
- 329 2. Higley MJ & Contreras D (2006) Balanced excitation and inhibition determine spike timing during  
330 frequency adaptation. *The Journal of neuroscience : the official journal of the Society for*  
331 *Neuroscience* 26(2):448-457.
- 332 3. Pouille F & Scanziani M (2001) Enforcement of temporal fidelity in pyramidal cells by somatic feed-  
333 forward inhibition. *Science* 293(5532):1159-1163.
- 334 4. Wehr M & Zador AM (2003) Balanced inhibition underlies tuning and sharpens spike timing in  
335 auditory cortex. *Nature* 426(6965):442-446.
- 336 5. Beaulieu C & Somogyi P (1990) Targets and Quantitative Distribution of GABAergic Synapses in the  
337 Visual Cortex of the Cat. *The European journal of neuroscience* 2(10):896.
- 338 6. Miles R, Toth K, Gulyas AI, Hajos N, & Freund TF (1996) Differences between Somatic and Dendritic  
339 Inhibition in the Hippocampus. *Neuron* 16(4):815-823.
- 340 7. Lovett-Barron M, *et al.* (2012) Regulation of neuronal input transformations by tunable dendritic  
341 inhibition. *Nature neuroscience* 15(3):423-430, S421-423.
- 342 8. Bloss EB, *et al.* (2016) Structured Dendritic Inhibition Supports Branch-Selective Integration in CA1  
343 Pyramidal Cells. *Neuron* 89(5):1016-1030.
- 344 9. Tsubokawa H & Ross WN (1996) IPSPs modulate spike backpropagation and associated [Ca<sup>2+</sup>]<sub>i</sub>  
345 changes in the dendrites of hippocampal CA1 pyramidal neurons. *Journal of neurophysiology*  
346 76(5):2896-2906.
- 347 10. Chiu CQ, *et al.* (2013) Compartmentalization of GABAergic inhibition by dendritic spines. *Science*  
348 340(6133):759-762.
- 349 11. Palmer L, Murayama M, & Larkum M (2012) Inhibitory Regulation of Dendritic Activity in vivo.  
350 *Frontiers in neural circuits* 6:26.
- 351 12. Kanemoto Y, *et al.* (2011) Spatial distributions of GABA receptors and local inhibition of Ca<sup>2+</sup>  
352 transients studied with GABA uncaging in the dendrites of CA1 pyramidal neurons. *PLoS one*  
353 6(7):e22652.
- 354 13. Marlin JJ & Carter AG (2014) GABA-A receptor inhibition of local calcium signaling in spines and  
355 dendrites. *The Journal of neuroscience : the official journal of the Society for Neuroscience*  
356 34(48):15898-15911.
- 357 14. Mullner FE, Wierenga CJ, & Bonhoeffer T (2015) Precision of Inhibition: Dendritic Inhibition by  
358 Individual GABAergic Synapses on Hippocampal Pyramidal Cells Is Confined in Space and Time.  
359 *Neuron* 87(3):576-589.
- 360 15. Stokes CC, Teeter CM, & Isaacson JS (2014) Single dendrite-targeting interneurons generate  
361 branch-specific inhibition. *Frontiers in neural circuits* 8:139.
- 362 16. Cook EP & Johnston D (1999) Voltage-dependent properties of dendrites that eliminate location-  
363 dependent variability of synaptic input. *Journal of neurophysiology* 81(2):535-543.
- 364 17. Johnston D & Narayanan R (2008) Active dendrites: colorful wings of the mysterious butterflies.  
365 *Trends in neurosciences* 31(6):309-316.
- 366 18. Miller JP, Rall W, & Rinzel J (1985) Synaptic amplification by active membrane in dendritic spines.  
367 *Brain research* 325(1-2):325-330.
- 368 19. Poirazi P & Mel BW (2001) Impact of active dendrites and structural plasticity on the memory capacity  
369 of neural tissue. *Neuron* 29(3):779-796.
- 370 20. Shepherd GM, *et al.* (1985) Signal enhancement in distal cortical dendrites by means of interactions  
371 between active dendritic spines. *Proceedings of the National Academy of Sciences of the United*  
372 *States of America* 82(7):2192-2195.
- 373 21. Gasparini S (2011) Distance- and activity-dependent modulation of spike back-propagation in layer V  
374 pyramidal neurons of the medial entorhinal cortex. *Journal of neurophysiology* 105(3):1372-1379.
- 375 22. Hoffman DA, Magee JC, Colbert CM, & Johnston D (1997) K<sup>+</sup> channel regulation of signal  
376 propagation in dendrites of hippocampal pyramidal neurons. *Nature* 387(6636):869-875.

- 377 23. Cai X, *et al.* (2004) Unique roles of SK and Kv4.2 potassium channels in dendritic integration. *Neuron*  
378 44(2):351-364.
- 379 24. Harnett MT, Xu NL, Magee JC, & Williams SR (2013) Potassium channels control the interaction  
380 between active dendritic integration compartments in layer 5 cortical pyramidal neurons. *Neuron*  
381 79(3):516-529.
- 382 25. Ramakers GM & Storm JF (2002) A postsynaptic transient K(+) current modulated by arachidonic  
383 acid regulates synaptic integration and threshold for LTP induction in hippocampal pyramidal cells.  
384 *Proceedings of the National Academy of Sciences of the United States of America* 99(15):10144-  
385 10149.
- 386 26. Carrasquillo Y, Burkhalter A, & Nerbonne JM (2012) A-type K<sup>+</sup> channels encoded by Kv4.2, Kv4.3  
387 and Kv1.4 differentially regulate intrinsic excitability of cortical pyramidal neurons. *The Journal of*  
388 *physiology* 590(16):3877-3890.
- 389 27. Burkhalter A, Gonchar Y, Mellor RL, & Nerbonne JM (2006) Differential expression of I(A) channel  
390 subunits Kv4.2 and Kv4.3 in mouse visual cortical neurons and synapses. *The Journal of*  
391 *neuroscience : the official journal of the Society for Neuroscience* 26(47):12274-12282.
- 392 28. Jinno S, Jeromin A, & Kosaka T (2005) Postsynaptic and extrasynaptic localization of Kv4.2 channels  
393 in the mouse hippocampal region, with special reference to targeted clustering at gabaergic  
394 synapses. *Neuroscience* 134(2):483-494.
- 395 29. Rial Verde EM, Zayat L, Etchenique R, & Yuste R (2008) Photorelease of GABA with Visible Light  
396 Using an Inorganic Caging Group. *Frontiers in neural circuits* 2:2.
- 397 30. Bekkers JM (2000) Distribution and activation of voltage-gated potassium channels in cell-attached  
398 and outside-out patches from large layer 5 cortical pyramidal neurons of the rat. *The Journal of*  
399 *physiology* 525 Pt 3:611-620.
- 400 31. Kim J, Wei DS, & Hoffman DA (2005) Kv4 potassium channel subunits control action potential  
401 repolarization and frequency-dependent broadening in rat hippocampal CA1 pyramidal neurones. *The*  
402 *Journal of physiology* 569(Pt 1):41-57.
- 403 32. Foeger NC, Norris AJ, Wren LM, & Nerbonne JM (2012) Augmentation of Kv4.2-encoded currents by  
404 accessory dipeptidyl peptidase 6 and 10 subunits reflects selective cell surface Kv4.2 protein  
405 stabilization. *The Journal of biological chemistry* 287(12):9640-9650.
- 406 33. Magee JC & Carruth M (1999) Dendritic voltage-gated ion channels regulate the action potential firing  
407 mode of hippocampal CA1 pyramidal neurons. *Journal of neurophysiology* 82(4):1895-1901.
- 408 34. Losonczy A, Makara JK, & Magee JC (2008) Compartmentalized dendritic plasticity and input feature  
409 storage in neurons. *Nature* 452(7186):436-441.
- 410 35. Serodio P, Kentros C, & Rudy B (1994) Identification of molecular components of A-type channels  
411 activating at subthreshold potentials. *Journal of neurophysiology* 72(4):1516-1529.
- 412 36. Serodio P & Rudy B (1998) Differential expression of Kv4 K<sup>+</sup> channel subunits mediating  
413 subthreshold transient K<sup>+</sup> (A-type) currents in rat brain. *Journal of neurophysiology* 79(2):1081-1091.
- 414 37. Clark BD, *et al.* (2008) DPP6 Localization in Brain Supports Function as a Kv4 Channel Associated  
415 Protein. *Frontiers in molecular neuroscience* 1:8.
- 416 38. Korngreen A & Sakmann B (2000) Voltage-gated K<sup>+</sup> channels in layer 5 neocortical pyramidal  
417 neurones from young rats: subtypes and gradients. *The Journal of physiology* 525 Pt 3:621-639.
- 418 39. Kim J, Jung SC, Clemens AM, Petralia RS, & Hoffman DA (2007) Regulation of dendritic excitability  
419 by activity-dependent trafficking of the A-type K<sup>+</sup> channel subunit Kv4.2 in hippocampal neurons.  
420 *Neuron* 54(6):933-947.
- 421 40. Frick A, Magee J, Koester HJ, Migliore M, & Johnston D (2003) Normalization of Ca<sup>2+</sup> signals by  
422 small oblique dendrites of CA1 pyramidal neurons. *The Journal of neuroscience : the official journal of*  
423 *the Society for Neuroscience* 23(8):3243-3250.
- 424 41. Yuste R (1997) Potassium channels. Dendritic shock absorbers. *Nature* 387(6636):851, 853.
- 425 42. Magee JC & Johnston D (1997) A synaptically controlled, associative signal for Hebbian plasticity in  
426 hippocampal neurons. *Science* 275(5297):209-213.
- 427 43. Markram H, Lubke J, Frotscher M, & Sakmann B (1997) Regulation of synaptic efficacy by  
428 coincidence of postsynaptic APs and EPSPs. *Science* 275(5297):213-215.
- 429 44. Hayama T, *et al.* (2013) GABA promotes the competitive selection of dendritic spines by controlling  
430 local Ca<sup>2+</sup> signaling. *Nature neuroscience* 16(10):1409-1416.
- 431 45. Wilmes KA, Sprekeler H, & Schreiber S (2016) Inhibition as a Binary Switch for Excitatory Plasticity in  
432 Pyramidal Neurons. *PLoS computational biology* 12(3):e1004768.

- 433 46. Cichon J & Gan WB (2015) Branch-specific dendritic Ca(2+) spikes cause persistent synaptic  
434 plasticity. *Nature* 520(7546):180-185.
- 435 47. Paille V, et al. (2013) GABAergic circuits control spike-timing-dependent plasticity. *The Journal of*  
436 *neuroscience : the official journal of the Society for Neuroscience* 33(22):9353-9363.
- 437 48. Zucker RS, Delaney KR, Mulkey R, & Tank DW (1991) Presynaptic calcium in transmitter release and  
438 posttetanic potentiation. *Annals of the New York Academy of Sciences* 635:191-207.
- 439 49. Augustine GJ (1990) Regulation of transmitter release at the squid giant synapse by presynaptic  
440 delayed rectifier potassium current. *The Journal of physiology* 431:343-364.
- 441 50. Larkum ME, Zhu JJ, & Sakmann B (1999) A new cellular mechanism for coupling inputs arriving at  
442 different cortical layers. *Nature* 398(6725):338-341.
- 443 51. Grewe BF, Bonnan A, & Frick A (2010) Back-Propagation of Physiological Action Potential Output in  
444 Dendrites of Slender-Tufted L5A Pyramidal Neurons. *Frontiers in cellular neuroscience* 4:13.
- 445 52. Migliore M, Hoffman DA, Magee JC, & Johnston D (1999) Role of an A-type K<sup>+</sup> conductance in the  
446 back-propagation of action potentials in the dendrites of hippocampal pyramidal neurons. *Journal of*  
447 *computational neuroscience* 7(1):5-15.
- 448 53. Acker CD & Antic SD (2009) Quantitative assessment of the distributions of membrane conductances  
449 involved in action potential backpropagation along basal dendrites. *Journal of neurophysiology*  
450 101(3):1524-1541.
- 451 54. Polsky A, Mel BW, & Schiller J (2004) Computational subunits in thin dendrites of pyramidal cells.  
452 *Nature neuroscience* 7(6):621-627.

453

454

455

456 **Figure Legends**

457

458 **Figure 1. GABAergic inhibition of  $\Delta\text{Ca}^{2+}$  is enhanced by blockade of potassium channels.**

459 (A) Whole Cell patch recordings were performed in L5PNs of visual cortex.  $\text{Ca}^{2+}$  imaging and GABA  
460 uncaging were performed along the proximal apical dendrite, as shown in the example cell (A1) and  
461 schematic (A2). (B) Example spine-dendrite pair and the associated line-scanned response to a bAP. (C)  
462 Average  $\pm$  SEM somatic voltage recorded before (black) and after (green) treatment with 4-AP for action  
463 potentials (upper traces) and uncaging-evoked IPSPs (lower traces). (D) Example bAP-evoked  $\Delta\text{Ca}^{2+}$  for  
464 the apical dendritic region shown in (B) for bAP alone (black, blue) or paired with GABA uncaging (red,  
465 orange) for the spine and neighboring dendrite, before (left) and after (right) treatment with 5 mM 4-AP.  
466 (E) Average ( $n=10$ )  $\Delta\text{Ca}^{2+}$  for the population of imaged spines and dendrites, colors as in (D). (F-G)  
467 Population data ( $n=10$ ) showing the magnitude of  $\Delta\text{Ca}^{2+}$  inhibition and peak bAP-evoked  $\Delta\text{Ca}^{2+}$  for  
468 spines (F) and neighboring dendrites (G) before (black) and after (green) treatment with 5 mM 4-AP  
469 (Wilcoxon matched-pairs signed rank test,  $*p<0.05$ ).

470

471 **Figure 2. GABAergic inhibition of  $\Delta\text{Ca}^{2+}$  is enhanced by local blockade of potassium channels.**

472 (A) Schematic of recording and imaging configuration, illustrating location of puffed 4-AP. (B) Average  $\pm$   
473 SEM ( $n=7$ )  $\text{Ca}^{2+}$  transients for bAP alone or paired with GABA uncaging before (left) and after (right)  
474 application of 4-AP to the proximal apical dendrite (colors as in Fig. 1). (C-D) Population data ( $n=7$ )  
475 showing the magnitude of  $\text{Ca}^{2+}$  inhibition and peak bAP-evoked  $\text{Ca}^{2+}$  for spines (C) and neighboring  
476 dendritic shafts (D) in control (black) and 4-AP (green) conditions (Wilcoxon matched-pairs signed rank  
477 test,  $*p<0.05$ ).

478

479 **Figure 3. Somatic activity enhances GABAergic inhibition of dendritic  $\Delta\text{Ca}^{2+}$ .**

480 (A) Average  $\pm$  SEM ( $n=10$ ) of somatic recordings for a single action potential (black) or when preceded 20  
481 ms by a 100 Hz train of action potentials (green). Inset shows change in spike waveform. (B) Average  $\pm$   
482 SEM ( $n=10$ )  $\text{Ca}^{2+}$  transients for bAP alone or paired with GABA uncaging, presented either singly (left) or  
483 following a 100 Hz train of action potentials (right)(colors as in Fig. 1). (C-D) Population data ( $n=10$ )  
484 showing the magnitude of  $\text{Ca}^{2+}$  inhibition and peak bAP-evoked  $\text{Ca}^{2+}$  for spines (C) and neighboring  
485 dendritic shafts (D), presented either singly (black) or following a 100 Hz train of action potentials  
486 (green)(Wilcoxon matched-pairs signed rank test,  $*p<0.05$ ).

487

488 **Figure 4. Somatic activity enhances synaptic GABAergic inhibition of  $\Delta\text{Ca}^{2+}$ .**

489 (A) Schematic showing recording and imaging configuration. ChR2 was virally expressed in somatostatin-  
490 containing interneurons (SOM-INs) and activated with blue light pulses. (B) Average  $\pm$  SEM ( $n=10$ )  $\text{Ca}^{2+}$   
491 transients for bAP alone or paired with optical stimulation of SOM-INs, presented either singly (left) or  
492 following a 100 Hz train of action potentials (right)(colors as in Fig. 1). (C-D) Population data ( $n=10$ )



493 showing the magnitude of Ca<sup>2+</sup> inhibition and peak bAP-evoked Ca<sup>2+</sup> for spines (C) and neighboring  
494 dendritic shafts (D), presented either singly (black) or following a 100 Hz train of action potentials  
495 (green)(Wilcoxon matched-pairs signed rank test, \*p<0.05).

496

497 **Figure 5. Computational simulations reveal mechanisms underlying potassium channel-**  
498 **dependent regulation of inhibition.**

499 (A) Simulated action potential waveforms and Ca<sup>2+</sup> currents under control conditions (black) and when  
500 preceded 15 ms by a GABAergic IPSP for a control value of gK<sub>A</sub> (A1) and lowered gK<sub>A</sub> (A2). (B)  
501 Relationship between peak membrane potential during the AP and the magnitude of gK<sub>A</sub> for control  
502 conditions (black) and following GABAergic inhibition (red). The baseline resting membrane potential is  
503 shown in green. (C) Relationship between peak Ca<sup>2+</sup> current and peak membrane potential during the  
504 AP for control conditions (black) and following GABAergic inhibition (red). Lines traverse varying  
505 magnitude of gK<sub>A</sub> values.

506

507 **Supplemental Figure 1. GABAergic inhibition of ΔCa<sup>2+</sup> in the proximal apical dendrite is not**  
508 **affected by somatic potassium channel blockade.**

509 (A) Schematic of recording and imaging configuration, illustrating somatic location of puffed 4-AP. (B)  
510 Average ± SEM (n=6) Ca<sup>2+</sup> transients for bAP alone or paired with GABA uncaging before (left) and after  
511 (right) application of 4-AP to the soma (colors as in Fig. 1). (C-D) Population data (n=6) showing the  
512 magnitude of Ca<sup>2+</sup> inhibition and peak bAP-evoked Ca<sup>2+</sup> for spines (C) and neighboring dendritic shafts  
513 (D) in control (black) and 4-AP (green) conditions (Wilcoxon matched-pairs signed rank test, p>0.05).

514

515 **Supplemental Figure 2. Activity-dependent enhancement of GABAergic inhibition is occluded by**  
516 **blockade of potassium channels.**

517 (A) Average ± SEM (n=10) of somatic recordings for a single action potential (black) or when preceded  
518 20 ms by a 100 Hz train of action potentials (green), in the presence of 5 mM 4-AP. Inset shows change  
519 in spike waveform. (B) Average ± SEM (n=10) Ca<sup>2+</sup> transients for bAP alone or paired with GABA  
520 uncaging, presented either singly (left) or following a 100 Hz train of action potentials (right), in the  
521 presence of 4-AP (colors as in Fig. 1). (C-D) Population data (n=10) showing the magnitude of Ca<sup>2+</sup>  
522 inhibition and peak bAP-evoked Ca<sup>2+</sup> for spines (C) and neighboring dendritic shafts (D), presented  
523 either singly (black) or following a 100 Hz train of action potentials (green), in the presence of 4-AP  
524 (Wilcoxon matched-pairs signed rank test, \*p<0.05).



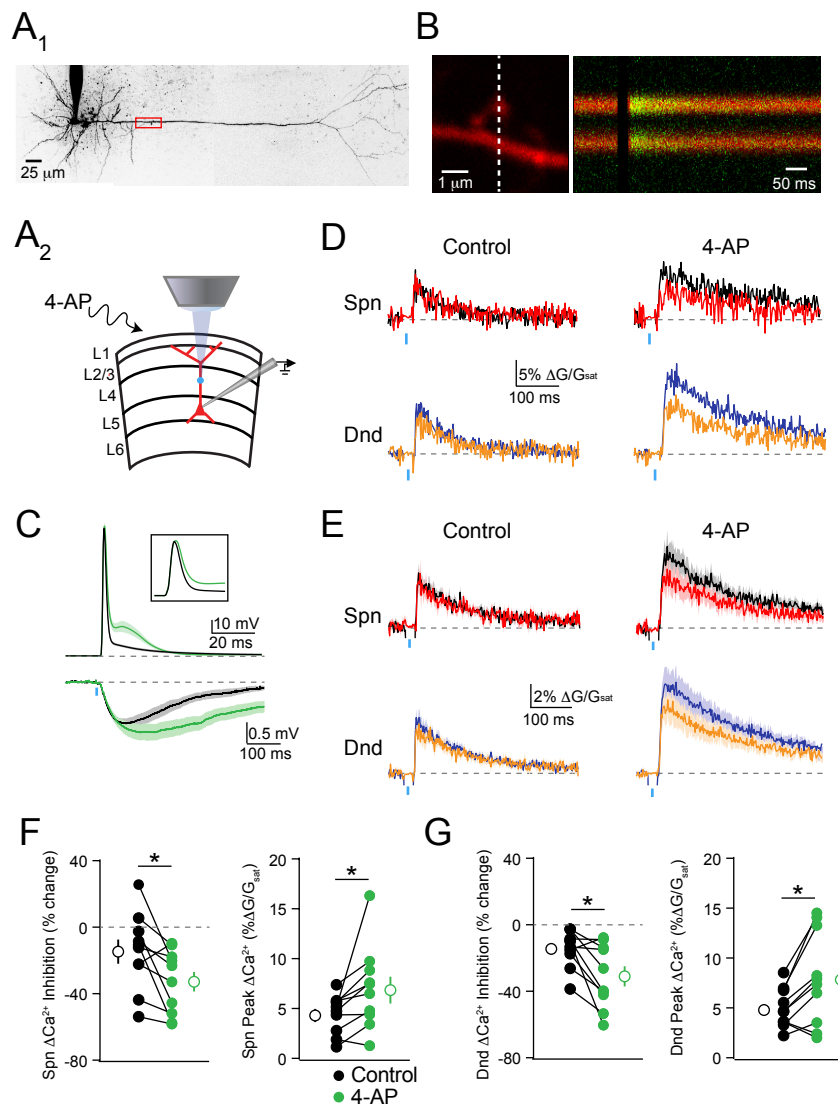

Figure 1

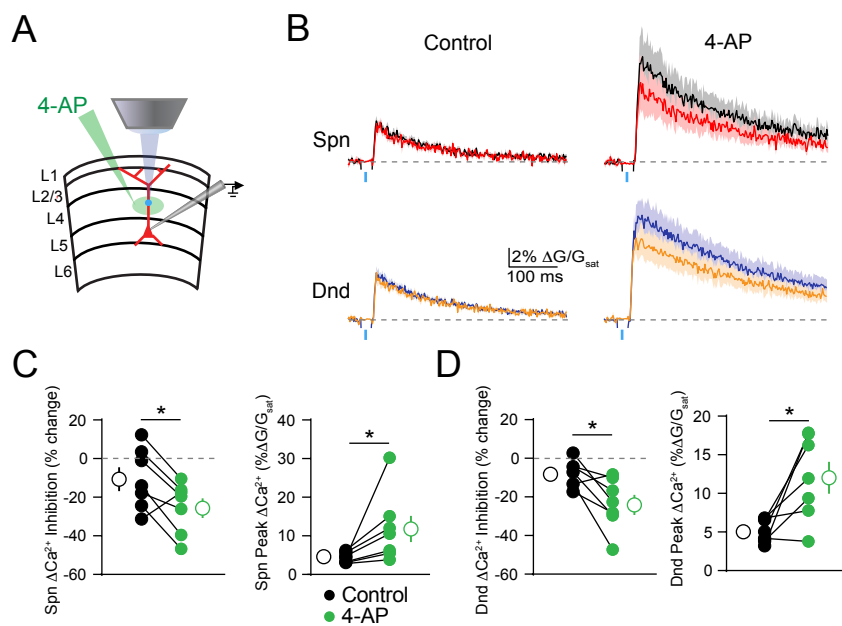

Figure 2

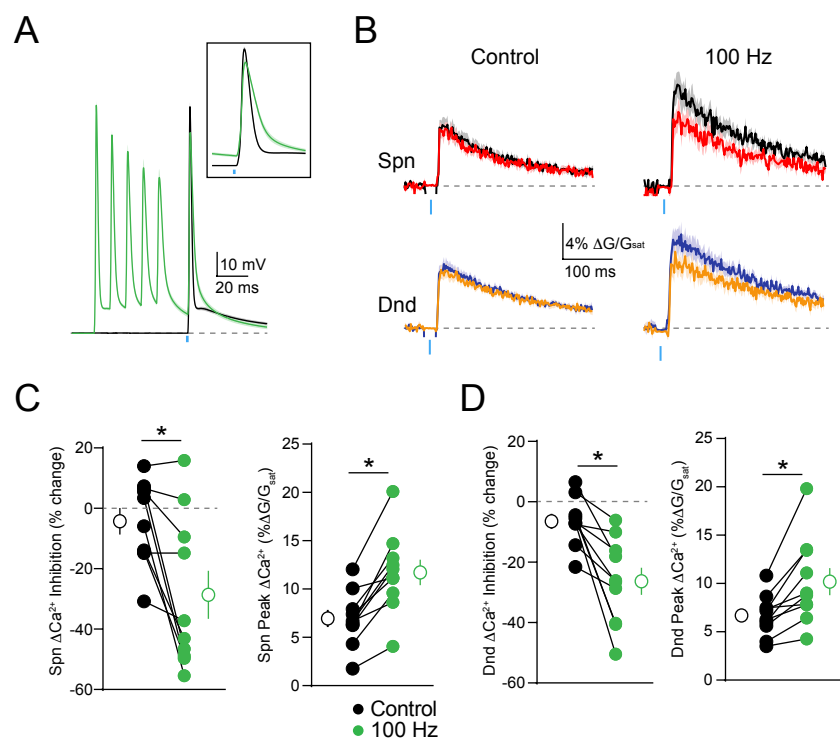

Figure 3

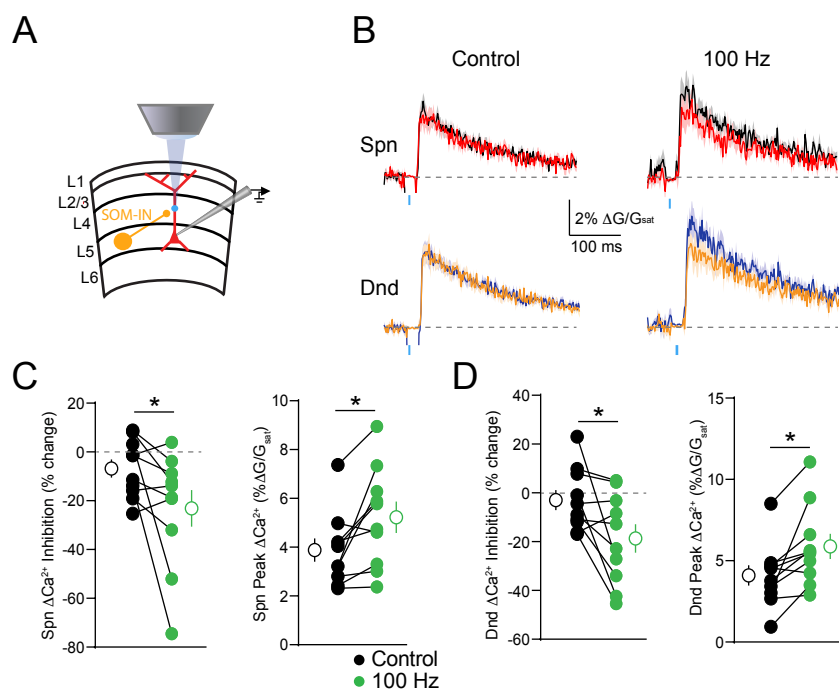

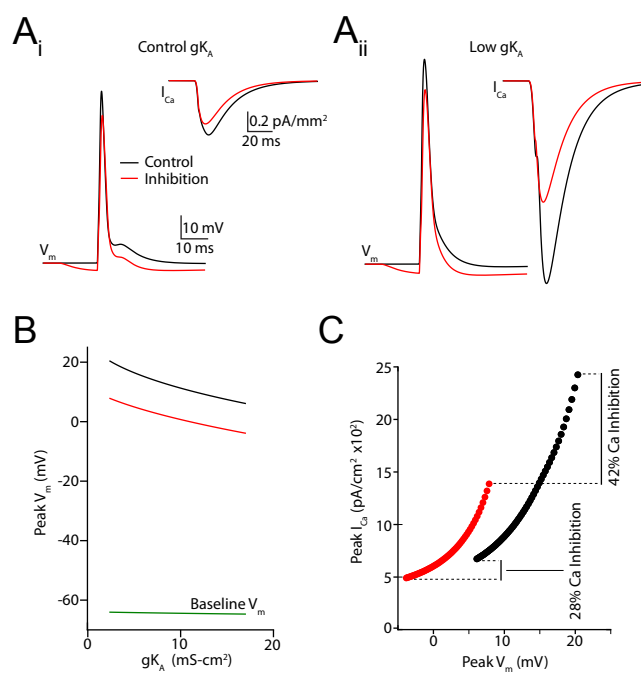

Figure 5

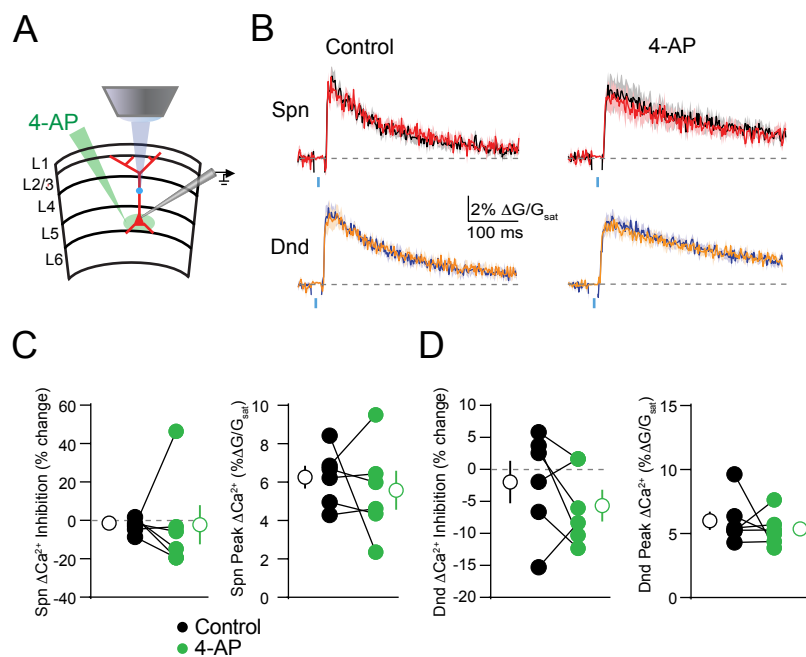

Supplemental Figure 1

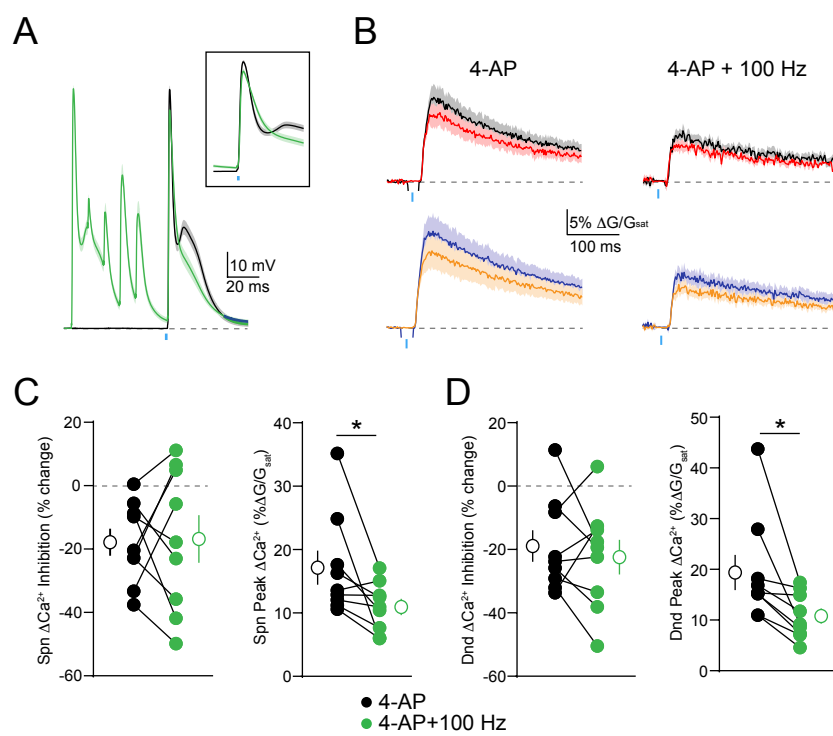

Supplemental Figure 2
